# Supplementary material
Source: Research Square preprint supplement (doi:10.21203/rs.3.rs-8908398/v1)
Supplement: Supplementary file 1 [file 933c834b4d636383f73b52d0.pdf]

# Supplementary File S1: Questionnaire items used in the analysis

**Article title:** Social determinants and factors associated with use of SARS-CoV-2 self-tests during the first months of self-test availability: findings from a population-based cohort study in France

**First author:** Salomé Garnier

This appendix presents the EpiCov survey items used in the present study. Because EpiCov is a multi-wave national survey with extensive questionnaires, **only items included in the analyses are listed here**. Question wording was translated from French into English by the authors. Variables originate from Waves 1–3 of EpiCov and linked external databases (FIDELI).

## EpiCov Survey Wave 1

**What diploma(s) do you have?**

- Less than high school degree
- High school degree
- Undergraduate degree
- Graduate degree

**What is your nationality?**

- French by birth
- Became French (naturalized)
- Foreign nationality

**What is your occupation? / What was your last occupation?**

- Farmers
- Self-employed / business owners / artisans
- Managers and higher intellectual professions
- Intermediate professions
- Employees
- Manual workers

**Over the past three months, how often have you used the internet?**

- Every day
- Sometimes
- Never

**How is your health in general?**

- Very good
- Good
- Fair
- Poor
- Very poor

**Do you have a chronic or long-term illness or health condition?**

- Yes
- No

**Since the beginning of the epidemic, have you experienced any of the following symptoms?**

- (Symptom list asked as binary yes/no items)

**Which statement best matches your opinion?**

- Lockdown measures are unnecessary
- Lockdown measures should be strictly respected as a civic duty
- Lockdown measures should be more flexible
- Lockdown measures should be stricter

**Do you trust public authorities to resolve the coronavirus crisis?**

- Yes, completely
- Yes, somewhat
- No, somewhat not
- No, not at all
- Don't know

**Do you trust scientists' ability to resolve the coronavirus crisis?**

- Yes, completely
- Yes, somewhat
- No, somewhat not
- No, not at all
- Don't know

## **EpiCov Survey Wave 2**

**Including yourself, how many people usually live in your household for most of the year?**

- Numeric response

**Have you been tested for coronavirus using a nasal swab or saliva test?**

- Yes
- No

**Was one of these tests positive?**

- Yes
- No
- Don't know / no result

**Why would you say that you did not take a coronavirus test?**

- I did not think about it
- I did not think I needed it
- It was too expensive
- I did not know where to go
- Waiting times were too long
- Other

**Regarding the possibility of catching coronavirus in the coming months, you would say you are:**

- Afraid of catching it and becoming seriously ill
- Afraid of catching it and infecting others
- At risk but not afraid
- Not at risk

**To what extent are you in favor of vaccinations in general?**

- Very favorable
- Somewhat favorable
- Somewhat unfavorable
- Not at all favorable

**If a free coronavirus vaccine were offered, would you be willing to get vaccinated?**

- Yes
- No
- Not sure

**Some people think the coronavirus was deliberately introduced by a foreign power. Is this also your opinion?**

- Yes, completely
- Rather yes

- Rather no
- Not at all
- Prefer not to answer

**Since the beginning of the epidemic, have you experienced any of the following symptoms?**

- (Symptom list asked as binary yes/no items)

## **EpiCov Survey Wave 3**

**Since last December, have you been tested for coronavirus using a nasal swab?**

- Yes
- No

**Where was your most recent test carried out?**

- Laboratory
- Pharmacy
- Self-test
- Other

**When was your most recent test?**

- Month categories (December 2020 – July 2021)

**Since last December, has someone living with you tested positive for coronavirus?**

- Yes
- No

**Have you or someone close to you had a severe form of COVID-19?**

- Yes, myself
- Yes, someone close
- No

**What was your main situation before the beginning of lockdown?**

- Employment
- Studies/apprenticeship/internship
- Unemployment
- Retirement
- Other

**Sex of respondent**

- Male
- Female
- Not reported

**Have you been vaccinated against COVID-19?**

- Yes
- No

**Do you intend to get vaccinated?**

- No
- Yes, regardless of vaccine
- Yes, depending on the vaccine
- Unsure
- Already vaccinated

**In the last 7 days, have you worked remotely?**

- Fully remote
- Hybrid
- Fully in person

**How many times have you left your home in the past 7 days?**

- Never
- Up to 5 times
- 6–10 times
- More than 10 times

**In the last 7 days, have you gone to the following places?**

- Public transport
- Cultural venue (cinema, theater, museum, etc.)
- Café or restaurant
- Party or gathering with more than six people
- Visiting family members not living with you

**Have you taken a vacation away from home since June 20?**

- Yes
- No

**Since December 2020, have you experienced any of the following symptoms?**

- (Symptom list asked as binary yes/no items)

## **FIDELI External database**

### **Living standard decile**

- Deciles 1-10

### **Poverty status**

- Below poverty threshold
- Above poverty threshold

### **Municipal population density**

- High density
- Medium density
- Low density
- Very low density
